# Supplementary material
Source: publisher site journal article supplement (https://www.dovepress.com/article/343057)
Supplement: Supplementary file 1 [file get_supplementary_file.php]

**Supplementary Table 1** socio-demographic characteristics of participants in different age groups and different isocaloric diet groups

| socio-demographic | | Age groups | | |  | Diet groups | | | |
| --- | --- | --- | --- | --- | --- | --- | --- | --- | --- |
| Characteristics | Young adult | | Middle-age | Old-age |  | NC | IHP | IHF | IHC |
| Education (%) | 100 | | 100* | 100**# |  | 100 | 100 | 100 | 100 |
| No formal education | 1.67 | | 5.00 | 13.33 |  | 6.67 | 6.67 | 6.67 | 4.44 |
| Elementary school | 6.67 | | 16.67 | 33.33 |  | 15.56 | 17.78 | 22.22 | 22.22 |
| Middle school | 8.33 | | 38.33 | 31.67 |  | 31.11 | 33.33 | 28.89 | 35.56 |
| High school/secondary technical school  Technical school/college  Postgraduate degree or above | 45.00  33.33  5.00 | | 25.00  13.33  1.67 | 16.67  5.00  0.00 |  | 33.33  11.11  2.22 | 33.33  8.89  0.00 | 31.11  8.89  0.00 | 31.11  4.44  2.22 |

**Notes:** **P*＜0.05, ***P*＜0.01 vs. young adult group. #*P*＜0.05 vs. middle-age group. There was no statistical difference in socio-demographic characteristics of participants in different isocaloric diet groups. Variables compared using χ2 -test and values presented with n (%).
